# Supplementary material for: Neodymium Isotopes in Glauconite for Palaeoceanographic Reconstructions at Continental Margins: A Preliminary Investigation From Demerara Rise
Source: Frontiers journal article supplement (doi:10.3389/feart.2021.652501), 2021-04-15
Supplement: Table_1.xlsx [file Table_1.xlsx]

## Sheet: Table S1
Table S1. Major element composition of Demerara glauconitic grains acquired by SEM/EDS microanalyses
Type	Al2O3	K2O	Fe2O3	MgO
Beige grains
Spot #1	12.6	2.85	26.6	2.92
Spot #2	12.2	2.93	26.1	4.07
Spot #3	11.9	2.7	25.2	2.38
Spot #4	12.1	2.95	26.1	3
Spot #5	11.95	3.3	25.4	3.55
Spot #6	11.15	3.2	29.8	3.05
Spot #7	11	2.85	24.7	3.23
Spot #8	10.55	3	24.3	2.82
Spot #9	10.6	3.55	32.7	3.22
Spot #10	10.45	2.75	35.1	3.18
Spot #11	10.2	2.75	32.5	3.05
Spot #12	10.1	2.5	27.7	3.09
Spot #13	10	2.65	32.3	2.74
Spot #14	9.7	3	30.8	2.89
Spot #15	8.45	1.55	25	2.82
Spot #16	4.5	1.15	34.7	3.55
Spot #17	4	1.45	34.9	2.64
Mean	10.0853	2.65471	29.0529	3.07059
1 SD	2.44027	0.660162	3.97981	0.393454
Light green grains
Spot #1	9.9	3.75	26.1	3.58
Spot #2	9.2	3.35	26.3	3.34
Spot #3	8.85	2.95	28.9	3.87
Spot #4	8.5	2.65	27.9	3.34
Spot #5	8.45	2.9	31.7	3.53
Spot #6	8.45	3.1	31.5	3.75
Spot #7	8.4	3.6	30.7	3.3
Spot #8	7.95	3.15	30.4	2.61
Spot #9	7.75	3.2	29.9	3.59
Spot #10	7.5	3.7	30.8	3.34
Spot #11	7.4	3.85	26.6	3.67
Spot #12	7.25	3.4	31.8	3.56
Spot #13	7.2	3.8	32.3	3.4
Spot #14	6.6	3.15	30.1	4.3
Spot #15	6.6	3.2	30.5	2.93
Spot #16	6.65	3.25	30.3	3.55
Spot #17	6.4	3.2	30	3.27
Spot #18	6.5	3.4	33.1	3.6
Spot #19	6.4	3.7	33.9	2.61
Spot #20	6.2	3.4	30.2	3.59
Spot #21	6.1	3.6	30.6	3.37
Spot #22	5.55	3.55	30	3.02
Spot #23	5.4	3.55	34.1	3.33
Spot #24	5.1	2.75	33.7	2.71
Spot #25	4.45	2.6	42	2.98
Spot #26	3.5	2.45	30.1	3.09
Spot #27	4.65	3.4	30.3	3.03
Spot #28	4.4	3.55	35	3.13
Spot #29	4.25	4	36	4.09
Spot #30	4.5	4.3	37.3	3.23
Spot #31	5.45	4.4	37.1	3.11
Spot #32	5.75	4.3	30.4	3.28
Spot #33	6.55	4.25	43.9	3.28
Spot #34	6.1	4.65	35.1	2.57
Spot #35	6.5	4.7	33.3	3.05
Spot #36	7.2	4.8	30.9	3.11
Spot #37	4.6	5.5	34.9	3.02
Spot #38	4	6	30.4	2.99
Spot #39	4.1	5.95	33.9	3.13
Mean	6.41795	3.71795	32.1026	3.28846
1 SD	1.60814	0.839759	3.71331	0.379227
Dark green grains
Spot #1	5.55	3.95	37.5	2.36
Spot #2	4.95	4.15	33.6	1.06
Spot #3	2.85	4.85	38.6	1.24
Spot #4	5.4	5.05	31.8	2.45
Spot #5	3.15	5.65	38.5	2.45
Spot #6	7.05	5.7	37.9	2.6
Spot #7	5.15	6.15	38.9	2.44
Spot #8	10.55	6.2	26.7	2.46
Spot #9	3.8	6.45	36.8	1.11
Spot #10	5.45	7	33.1	2.45
Spot #11	2.6	7.65	41.2	1.11
Mean	5.13636	5.70909	35.8727	1.97545
1 SD	2.25245	1.14539	4.16031	0.673875
